# Supplementary material for: Emission enhancement in a luminescent polychlorinated diphenylpyridylmethyl radical through coordination to silver( i )
Source: Royal Society of Chemistry journal article supplement (doi:10.1039/d4dt03129f), 2024-12-17
Supplement: d4dt03129f1.pdf [file d4dt03129f1.pdf]

## *Supplementary Information*

# **Emission enhancement in a luminescent polychlorinated diphenylpyridylmethyl radical through coordination to silver(I)**

Takuto Mibu,<sup>\*ab</sup> Ryota Matsuoka,<sup>ab</sup> Masanari Nagasaka,<sup>a</sup> and Tetsuro Kusamoto<sup>\*abcd</sup>

<sup>a</sup>Institute for Molecular Science, Okazaki, Aichi 444-8585, Japan

<sup>b</sup>Division of Frontier Materials Science, Department of Materials Engineering Science, Graduate School of Engineering Science, Osaka University, Toyonaka, Osaka 560-8531, Japan

<sup>c</sup>Spintronics Research Network Division, Institute for Open and Transdisciplinary Research Initiatives, Osaka University, Toyonaka, Osaka 560-8531, Japan

<sup>d</sup>FOREST, JST, Honcho 4-1-8, Kawaguchi, Saitama 332-0012, Japan

\*Corresponding Authors. Email: t-mibu@sagami.or.jp; kusamoto.tetsuro.es@osaka-u.ac.jp

### **Table of Contents**

|                                                                                                     |    |
|-----------------------------------------------------------------------------------------------------|----|
| X-ray crystallographic analyses .....                                                               | 2  |
| Magnetic properties .....                                                                           | 3  |
| Concentration-dependent absorption of [Ag(PyBTM) <sub>2</sub> ](SbF <sub>6</sub> ) in solution..... | 4  |
| Titration experiments.....                                                                          | 5  |
| Soft X-ray absorption spectroscopy .....                                                            | 7  |
| ESR spectroscopy .....                                                                              | 8  |
| Excitation spectroscopy .....                                                                       | 9  |
| DFT and TD-DFT calculations .....                                                                   | 9  |
| References .....                                                                                    | 16 |

## X-ray crystallographic analyses

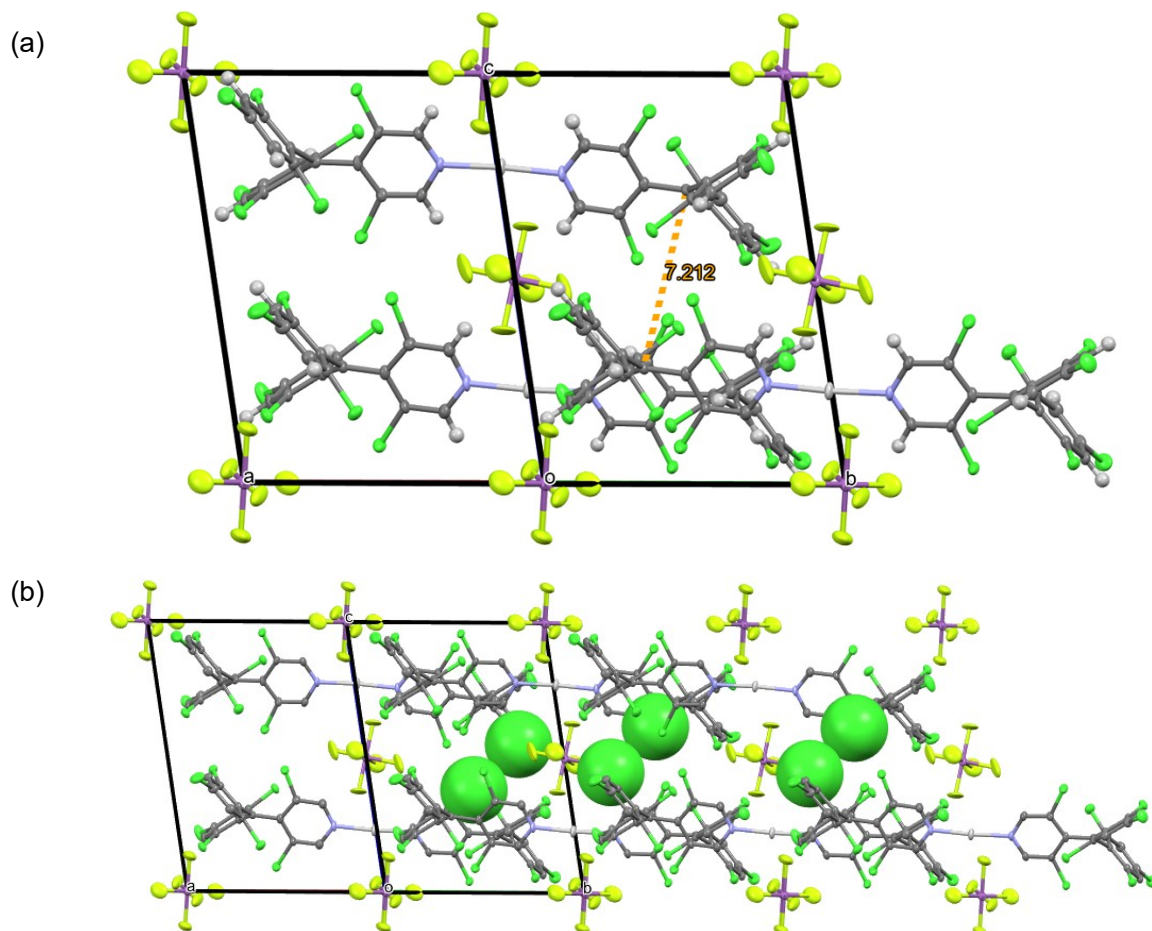

**Figure S1.** The crystal structure of [Ag(PyBTM)<sub>2</sub>](SbF<sub>6</sub>) showing (a) the shortest intermolecular distance between the radical carbon centers (C6...C24, 7.212 Å) and (b) Cl...Cl atomic contact (3.402 Å). The atoms are shown in an ellipsoidal model (50% probability) except some of the chlorine atoms in (b), which are shown in a space-fill model. Hydrogen atoms are omitted in (b) for clarity. C, dark gray; N, blue; F, yellow green; Cl, light green; Sb, purple; Ag, light gray; H, white.

Crystal Data for C<sub>36</sub>H<sub>12</sub>AgCl<sub>16</sub>F<sub>6</sub>N<sub>2</sub>Sb ( $M = 1383.31$  g/mol): triclinic, space group  $P-1$  (no. 2),  $a = 11.6295(2)$  Å,  $b = 14.5514(3)$  Å,  $c = 15.1131(3)$  Å,  $\alpha = 110.462(2)^\circ$ ,  $\beta = 92.463(2)^\circ$ ,  $\gamma = 106.895(2)^\circ$ ,  $V = 2262.72(8)$  Å<sup>3</sup>,  $Z = 2$ ,  $T = 123$  K,  $\mu(\text{Mo K}\alpha) = 0.723$  mm<sup>-1</sup>,  $D_{\text{calc}} = 2.030$  g/cm<sup>3</sup>, 31369 reflections measured ( $5.046^\circ \leq 2\theta \leq 54.968^\circ$ ), 10365 unique ( $R_{\text{int}} = 0.0333$ ,  $R_{\text{sigma}} = 0.0416$ ) which were used in all calculations. The final  $R_1$  was 0.0309 ( $I > 2\sigma(I)$ ) and  $wR_2$  was 0.0415 (all data). The goodness-of-fit on  $F_2$  was 1.073.

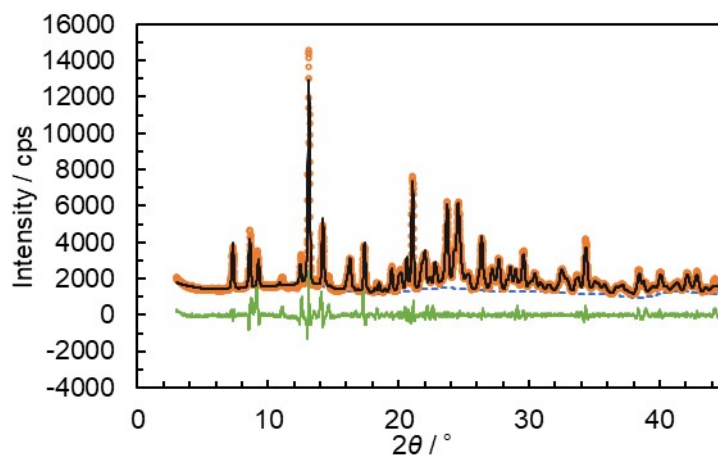

**Figure S2.** Observed (orange dots) and simulated (black line) powder X-ray diffraction profile of  $[\text{Ag}(\text{PyBTM})_2](\text{SbF}_6)$ . The bottom green curve represents the difference plot on the same intensity scale. The experimental PXRD pattern measured at room temperature was analyzed by whole-powder-pattern decomposition methods (Pawley method):  $a = 11.592(2) \text{ \AA}$ ,  $b = 14.401(3) \text{ \AA}$ ,  $c = 15.098(3) \text{ \AA}$ ,  $\alpha = 109.535(7)^\circ$ ,  $\beta = 92.843(6)^\circ$ ,  $\gamma = 106.930(5)^\circ$ ,  $V = 2241.920 \text{ \AA}^3$ ,  $R_{\text{wp}} = 0.0838$ ,  $R_p = 0.0533$ ,  $S = 2.9706$ ,  $\chi^2 = 8.8246$ .

### Magnetic properties

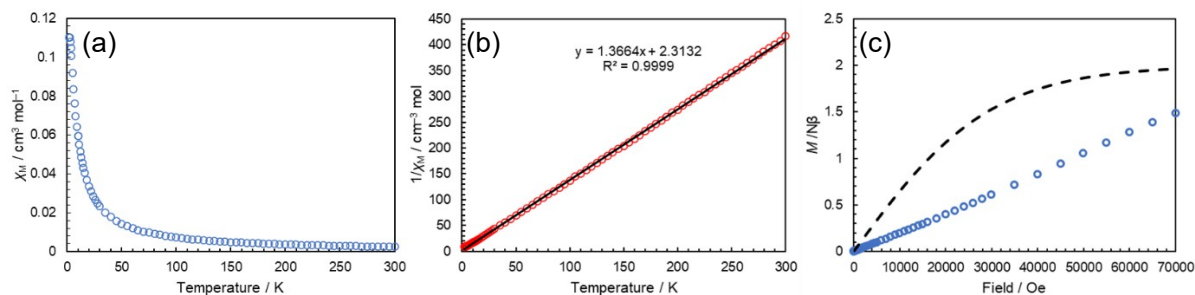

**Figure S3.** Temperature-dependent (a) magnetic susceptibility  $\chi_M$  and (b)  $1/\chi_M$  plots of  $[\text{Ag}(\text{PyBTM})_2](\text{SbF}_6)$  ( $H = 10000 \text{ Oe}$ ). The black line in (b) represents the Curie-Weiss fit. (c) Field-dependent magnetization plot of  $[\text{Ag}(\text{PyBTM})_2](\text{SbF}_6)$  ( $T = 2.0 \text{ K}$ ). The black dashed line represents the Brillouin function for non-interacting two  $S = 1/2$  spins.

### Concentration-dependent absorption of $[\text{Ag}(\text{PyBTM})_2](\text{SbF}_6)$ in solution

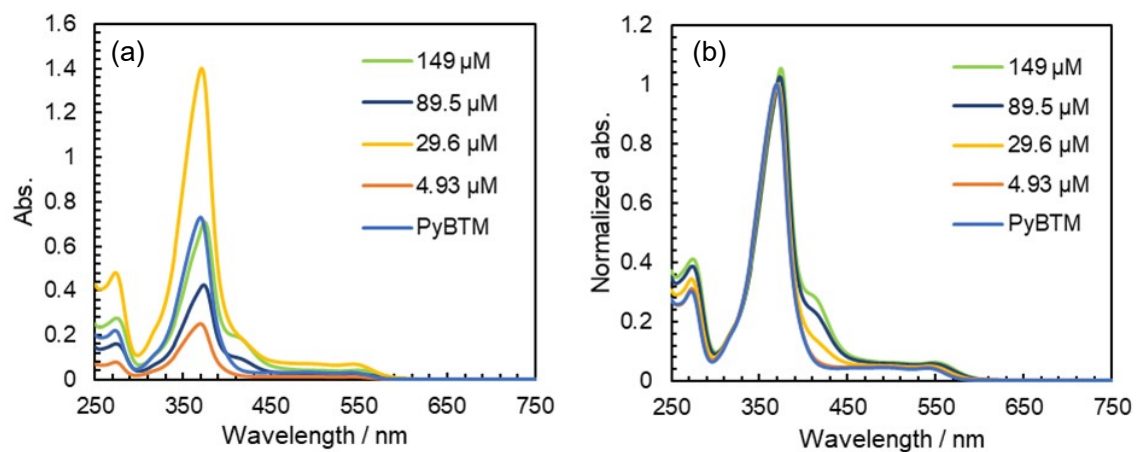

**Figure S4.** (a) Concentration-dependent absorption spectra of  $[\text{Ag}(\text{PyBTM})_2](\text{SbF}_6)$  in dichloromethane with the absorption spectrum of PyBTM (30  $\mu\text{M}$ ) in the same solvent. 149  $\mu\text{M}$  and 89.5  $\mu\text{M}$  solution were measured using a 1 mm pathlength cell and the others were measured using a 10 mm pathlength cell. (b) Normalized spectra of (a).

## Titration experiments

### Experimental procedure

0.78 mg of PyBTM was dissolved in  $\text{CH}_2\text{Cl}_2$  and diluted to 50 mL in a volumetric flask to prepare 30  $\mu\text{M}$  stock solution of PyBTM (**stock solution A**). 3.10 mg of  $\text{AgSbF}_6$  was dissolved in **stock solution A** and diluted to 25 mL in a volumetric flask to prepare a 361  $\mu\text{M}$  stock solution of  $\text{AgSbF}_6$  containing 30  $\mu\text{M}$  PyBTM (**stock solution B**). In a UV cell (pathlength = 10 mm), 3.0 mL of **stock solution A** was placed, and 0.05–0.20 mL each of **stock solution B** was titrated into the solution at the constant concentrations of PyBTM. UV-vis absorption measurements were performed during the titration. The absorption spectral change during the titration is shown in Figure 2a. The association constant  $K$  was determined by the least square fitting of the 1:1 binding model using the TitrationFit Software (Figure S5).<sup>1</sup>

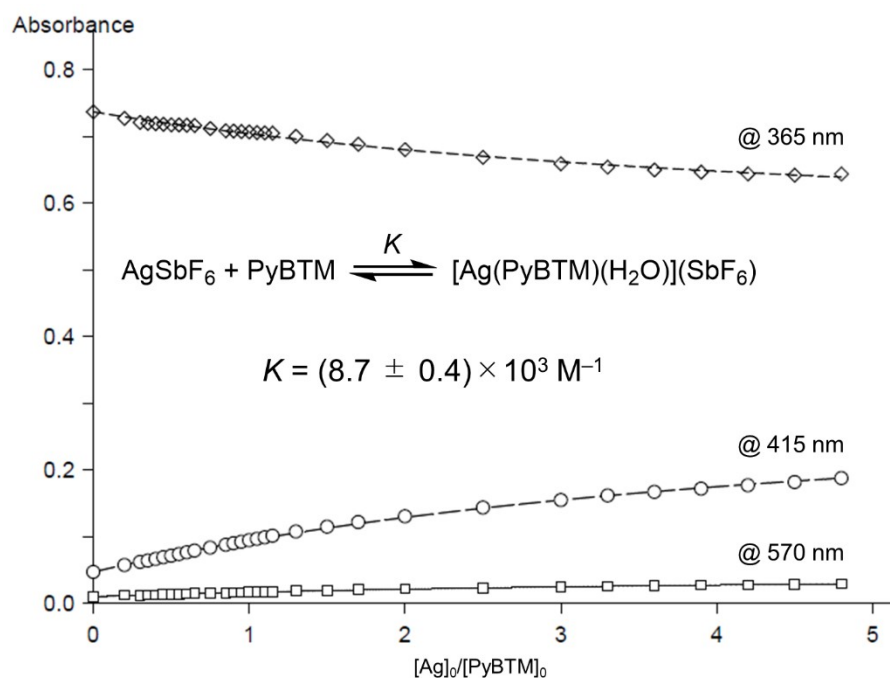

**Figure S5.** Changes in the absorbance of PyBTM (30  $\mu\text{M}$  in  $\text{CH}_2\text{Cl}_2$ ) at 365, 415, and 570 nm upon the addition of  $\text{AgSbF}_6$  (0–4.8 equiv.) at room temperature. The solid and dashed lines show the least squares fitting to determine the association constant  $K$  based on the equation shown in the figure.

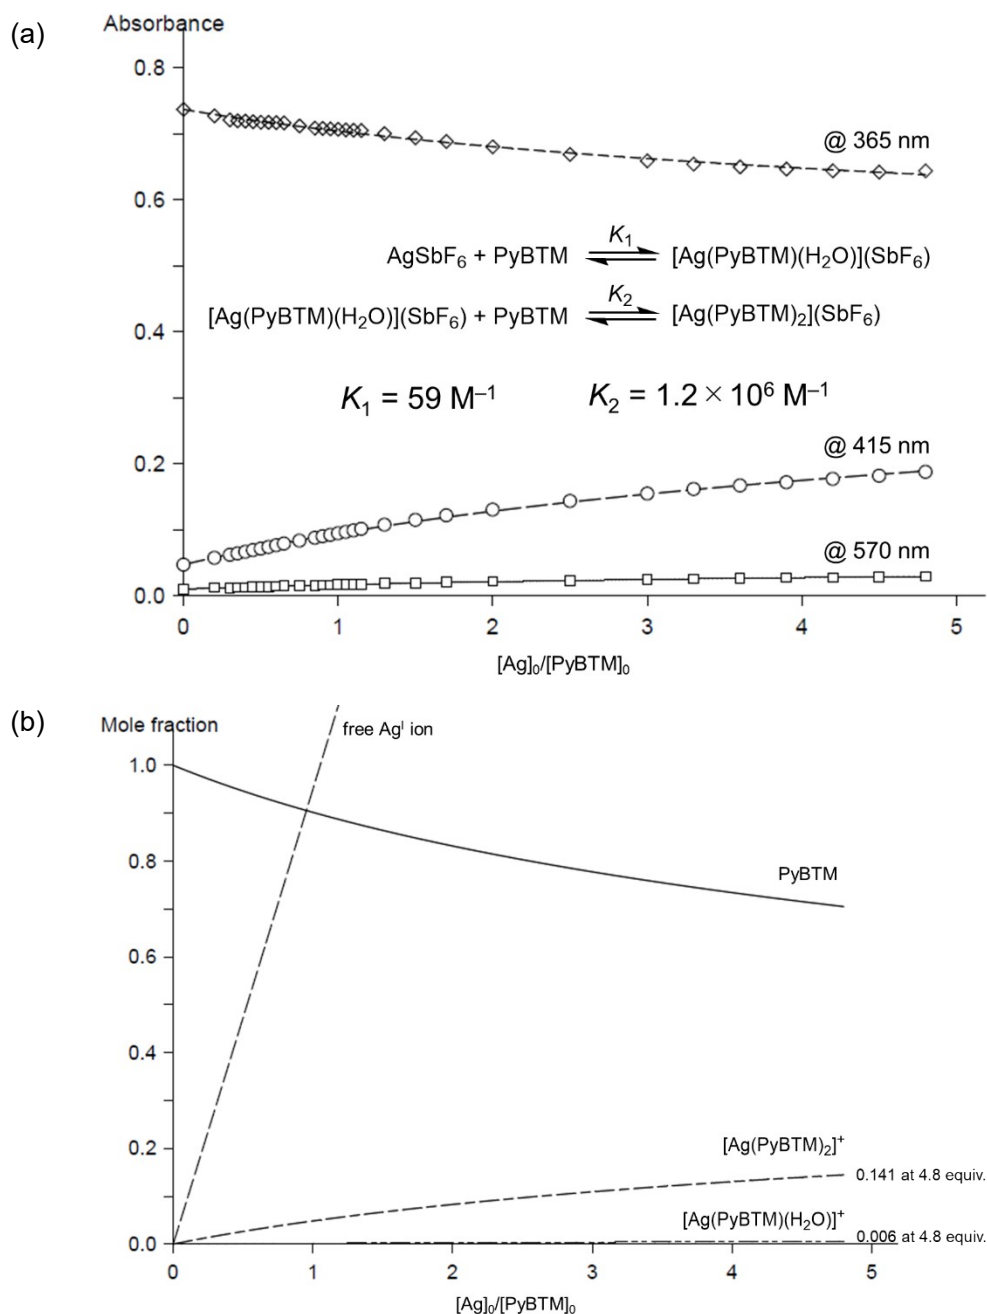

**Figure S6.** (a) One of the least squares fitting results of the titration data in Figure S5 based on the stepwise coordination equilibrium to give  $[\text{Ag}(\text{PyBTM})(\text{H}_2\text{O})]^+$  (**1b**<sup>+</sup>) and  $[\text{Ag}(\text{PyBTM})_2]^+$  (**1a**<sup>+</sup>) (the equations are shown in the figure). (b) The simulated mole fractions of PyBTM, free  $\text{Ag}^+$  ion, **1a**<sup>+</sup>, and **1b**<sup>+</sup> based on the equilibrium constants shown in (a).

The least squares fitting based on the stepwise coordination equilibrium did not converge to a single solution. However, we were able to simulate the mole fractions of the coordination products for each of the fitting solutions obtained. The simulations suggested that  $K_2$  must be several orders of magnitude higher than  $K_1$  for the exclusive formation of **1a**<sup>+</sup> (i.e., the mole fraction of **1b**<sup>+</sup> below 1%) during the titration. Such a  $K_2$  much larger than  $K_1$  is unrealistic in this molecular system. We therefore concluded that this stepwise model is unsuitable.

## Soft X-ray absorption spectroscopy

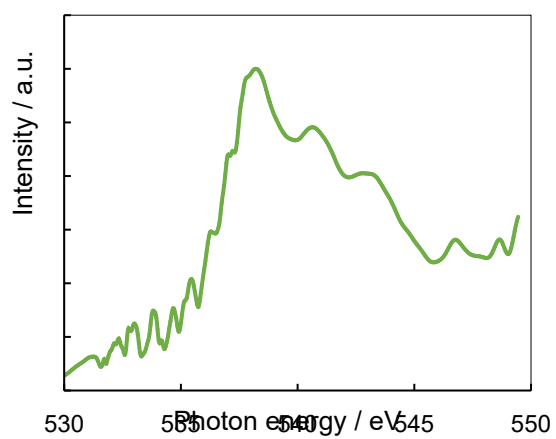

**Figure S7.** The oxygen *K*-edge X-ray absorption spectrum of  $\text{AgSbF}_6$  (21.3 mM) in  $\text{CH}_2\text{Cl}_2$  at room temperature. No distinct pre-edge peak was observed.

## ESR spectroscopy

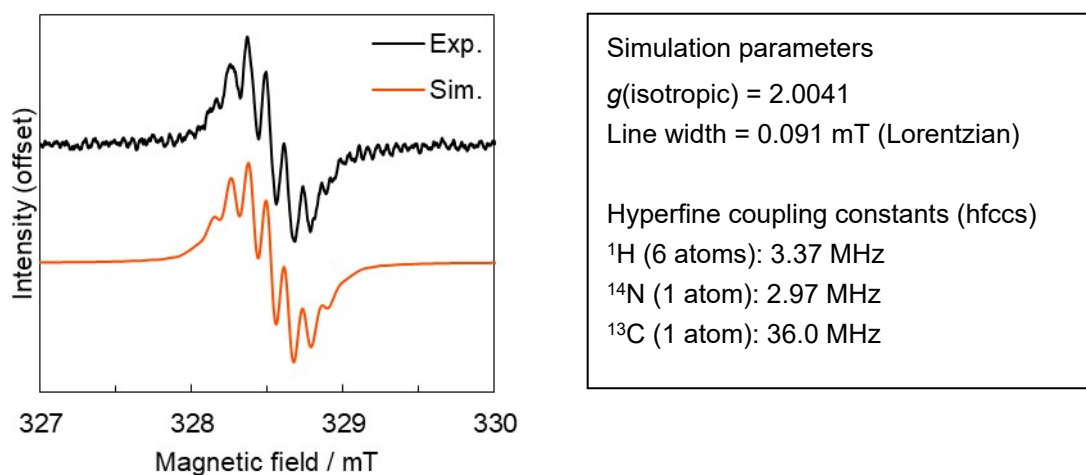

**Figure S8.** Measured (black) and simulated (orange) ESR spectra of PyBTM (30  $\mu\text{M}$ ) in  $\text{CH}_2\text{Cl}_2$  at 175 K. The fitting parameters are described in the right box.

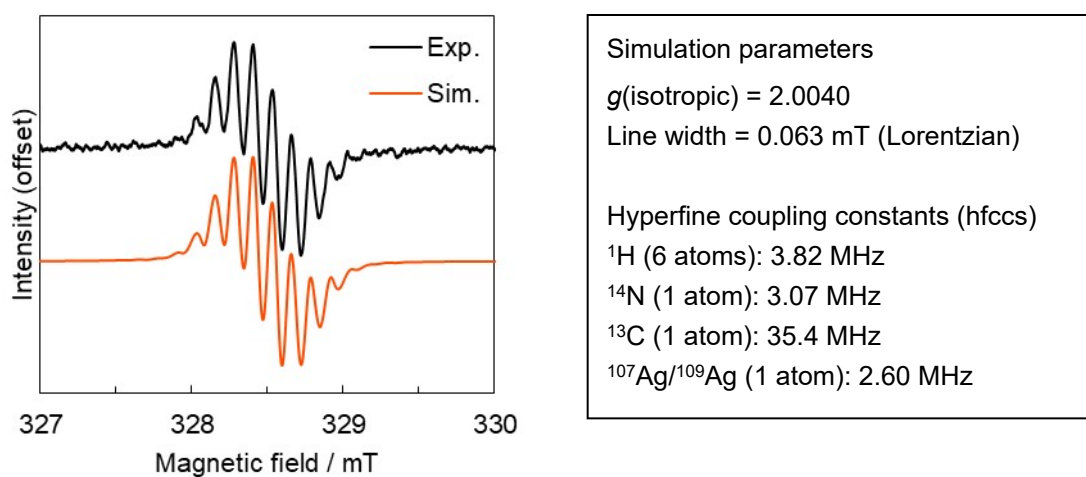

**Figure S9.** Measured (black) and simulated (orange) ESR spectra of **soln\_99** containing 30  $\mu\text{M}$  of **1b<sup>+</sup>** at 175 K. The fitting parameters are described in the right box.



## Excitation spectroscopy

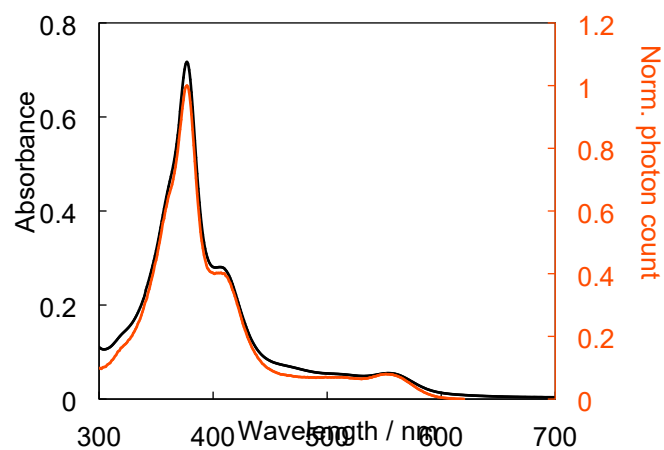

**Figure S10.** Absorption (black) and excitation (orange,  $\lambda_{em} = 670$  nm) spectra of **Soln\_99** containing  $30 \mu\text{M}$  of **1b**<sup>+</sup>.

## DFT and TD-DFT calculations

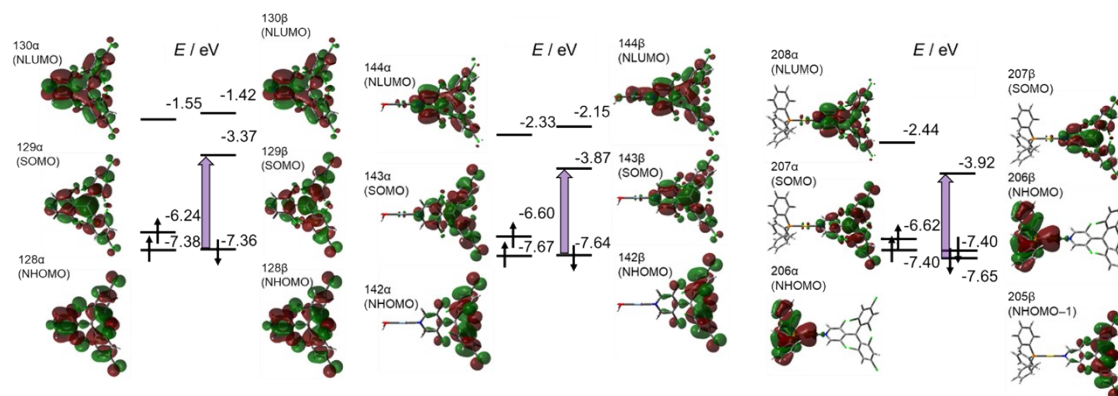

**Figure S11.** Frontier molecular orbitals of PyBTM,  $[\text{Ag}(\text{PyBTM})(\text{H}_2\text{O})]^+$  and  $[\text{Au}(\text{PyBTM})(\text{PPh}_3)]^+$  calculated using DFT (UM06/SDD(Ag or Au);6-31G(d)(H, C, N, Cl, and O or P)). The effect of the solvent (dichloromethane) was treated with the polarizable continuum model (PCM). The purple arrows indicate a major component of the lowest energy transition for each compound.

### Abstracted results of TD-DFT calculations

PyBTM (UM06/6-31g(d), SCRf (solvent = CH<sub>2</sub>Cl<sub>2</sub>)), ground state

129A is SOMO.

Excited State 1: 2.293-A 2.6232 eV 472.65 nm f=0.0279 <S\*\*2>=1.065

|             |          |
|-------------|----------|
| 129A ->131A | 0.27006  |
| 124B ->131B | -0.12247 |
| 125B ->129B | -0.18764 |
| 126B ->129B | 0.27461  |
| 128B ->129B | 0.83775  |

Excited State 2: 2.357-A 2.7635 eV 448.64 nm f=0.0077 <S\*\*2>=1.139

|             |          |
|-------------|----------|
| 128A ->131A | 0.13862  |
| 129A ->130A | 0.29903  |
| 129A ->137A | 0.10477  |
| 122B ->130B | 0.10455  |
| 124B ->129B | 0.59189  |
| 127B ->129B | 0.62443  |
| 128B ->131B | -0.11870 |

Excited State 3: 2.218-A 2.8863 eV 429.57 nm f=0.0141 <S\*\*2>=0.979

|             |          |
|-------------|----------|
| 129A ->131A | 0.13155  |
| 125B ->129B | -0.20667 |
| 126B ->129B | 0.84131  |
| 128B ->129B | -0.40186 |
| 128B ->130B | -0.11938 |

Excited State 4: 2.196-A 2.9961 eV 413.82 nm f=0.0022 <S\*\*2>=0.956

|             |          |
|-------------|----------|
| 129A ->130A | -0.18181 |
| 124B ->129B | -0.58259 |
| 127B ->129B | 0.73643  |

Excited State 5: 2.139-A 3.0018 eV 413.03 nm f=0.0078 <S\*\*2>=0.894

|             |          |
|-------------|----------|
| 129A ->131A | -0.10334 |
| 129A ->132A | -0.11919 |
| 125B ->129B | 0.89885  |
| 126B ->129B | 0.31856  |
| 127B ->131B | 0.11253  |
| 128B ->129B | 0.15642  |

[Ag(PyBTM)(H<sub>2</sub>O)]<sup>+</sup> (UM06/ SDD(Ag), 6-31G(d)(H, C, N, Cl, O), SCRF (solvent = CH<sub>2</sub>Cl<sub>2</sub>)), ground state 143A is SOMO.

|               |    |             |           |           |          |              |
|---------------|----|-------------|-----------|-----------|----------|--------------|
| Excited State | 1: | 2.201-A     | 2.4798 eV | 499.98 nm | f=0.0441 | <S**2>=0.961 |
|               |    | 143A ->146A | -0.10163  |           |          |              |
|               |    | 143A ->147A | -0.17548  |           |          |              |
|               |    | 140B ->143B | 0.18898   |           |          |              |
|               |    | 142B ->143B | 0.91278   |           |          |              |
|               |    | 142B ->144B | -0.11559  |           |          |              |
| Excited State | 2: | 2.248-A     | 2.6305 eV | 471.34 nm | f=0.0074 | <S**2>=1.014 |
|               |    | 143A ->144A | 0.26229   |           |          |              |
|               |    | 143A ->155A | -0.10008  |           |          |              |
|               |    | 136B ->143B | 0.12803   |           |          |              |
|               |    | 139B ->143B | 0.60101   |           |          |              |
|               |    | 141B ->143B | 0.66306   |           |          |              |
| Excited State | 3: | 2.115-A     | 2.7884 eV | 444.64 nm | f=0.0093 | <S**2>=0.868 |
|               |    | 139B ->143B | 0.18644   |           |          |              |
|               |    | 140B ->143B | 0.89839   |           |          |              |
|               |    | 141B ->143B | -0.23574  |           |          |              |
|               |    | 142B ->143B | -0.22026  |           |          |              |
| Excited State | 4: | 2.157-A     | 2.7924 eV | 444.01 nm | f=0.0036 | <S**2>=0.913 |
|               |    | 143A ->144A | -0.21496  |           |          |              |
|               |    | 139B ->143B | -0.56419  |           |          |              |
|               |    | 140B ->143B | 0.30568   |           |          |              |
|               |    | 141B ->143B | 0.68249   |           |          |              |
| Excited State | 5: | 2.331-A     | 3.0093 eV | 412.01 nm | f=0.0284 | <S**2>=1.108 |
|               |    | 139A ->144A | -0.16887  |           |          |              |
|               |    | 143A ->144A | 0.28462   |           |          |              |
|               |    | 143A ->146A | -0.14111  |           |          |              |
|               |    | 136B ->143B | 0.11718   |           |          |              |
|               |    | 138B ->143B | 0.87022   |           |          |              |
|               |    | 138B ->144B | 0.14566   |           |          |              |
|               |    | 139B ->143B | -0.14953  |           |          |              |
| Excited State | 6: | 2.248-A     | 3.0106 eV | 411.83 nm | f=0.1132 | <S**2>=1.013 |

|             |          |
|-------------|----------|
| 138A ->144A | 0.17553  |
| 139A ->146A | 0.10690  |
| 143A ->144A | 0.71486  |
| 136B ->143B | 0.31700  |
| 138B ->143B | -0.34278 |
| 139B ->143B | -0.36720 |

Excited State 7: 2.843-A 3.2134 eV 385.84 nm f=0.0777 <S\*\*2>=1.770

|             |          |
|-------------|----------|
| 136A ->144A | -0.11115 |
| 138A ->144A | 0.20951  |
| 139A ->146A | 0.18477  |
| 140A ->147A | -0.12688 |
| 140A ->148A | 0.11500  |
| 141A ->149A | -0.14322 |
| 142A ->147A | 0.16232  |
| 143A ->144A | -0.34830 |
| 143A ->155A | 0.13343  |
| 136B ->143B | 0.61395  |
| 136B ->144B | 0.11248  |
| 138B ->146B | 0.22725  |
| 139B ->143B | 0.18142  |
| 139B ->144B | 0.14943  |
| 140B ->147B | -0.11298 |
| 140B ->148B | 0.10761  |
| 141B ->149B | 0.12886  |
| 142B ->147B | -0.15004 |

Excited State 8: 2.910-A 3.2995 eV 375.76 nm f=0.1195 <S\*\*2>=1.867

|             |          |
|-------------|----------|
| 140A ->149A | 0.22321  |
| 141A ->148A | -0.23288 |
| 142A ->144A | -0.18892 |
| 142A ->155A | 0.13342  |
| 143A ->145A | -0.11697 |
| 143A ->146A | 0.32097  |
| 143A ->147A | 0.51829  |
| 138B ->143B | 0.15875  |
| 139B ->147B | -0.17873 |
| 140B ->143B | 0.16105  |
| 140B ->149B | 0.19568  |

|             |          |
|-------------|----------|
| 141B ->147B | -0.11836 |
| 141B ->148B | 0.18769  |
| 142B ->143B | 0.29190  |
| 142B ->144B | 0.19165  |
| 142B ->156B | 0.13123  |

Excited State 9: 2.360-A 3.6086 eV 343.58 nm f=0.0110 <S\*\*2>=1.142

|             |          |
|-------------|----------|
| 140A ->148A | -0.10035 |
| 141A ->149A | 0.11060  |
| 143A ->144A | -0.12308 |
| 137B ->143B | 0.89828  |
| 137B ->144B | 0.18814  |
| 141B ->149B | -0.10163 |

Excited State 10: 2.985-A 3.6145 eV 343.02 nm f=0.0191 <S\*\*2>=1.977

|             |          |
|-------------|----------|
| 140A ->147A | -0.14845 |
| 140A ->148A | 0.26313  |
| 141A ->149A | -0.29245 |
| 142A ->146A | 0.15237  |
| 142A ->147A | 0.14982  |
| 142A ->148A | 0.14555  |
| 143A ->144A | 0.33417  |
| 136B ->143B | -0.31680 |
| 137B ->143B | 0.32845  |
| 138B ->146B | -0.12739 |
| 139B ->143B | 0.20367  |
| 139B ->144B | 0.12880  |
| 139B ->156B | 0.10387  |
| 140B ->147B | -0.15267 |
| 140B ->148B | 0.24976  |
| 141B ->149B | 0.26997  |
| 142B ->146B | 0.13184  |
| 142B ->147B | -0.18490 |
| 142B ->148B | -0.13690 |

Excited State 11: 2.219-A 3.7378 eV 331.70 nm f=0.0081 <S\*\*2>=0.980

|             |          |
|-------------|----------|
| 138A ->146A | 0.14533  |
| 139A ->144A | -0.12593 |
| 143A ->145A | 0.18530  |

|             |          |
|-------------|----------|
| 143A ->146A | 0.84173  |
| 143A ->147A | -0.39720 |

Excited State 12: 3.115-A 3.8205 eV 324.53 nm f=0.0051 <S\*\*2>=2.176

|             |          |
|-------------|----------|
| 139A ->146A | -0.49756 |
| 139A ->147A | 0.21813  |
| 139A ->148A | 0.12789  |
| 136B ->143B | 0.51601  |
| 136B ->144B | -0.11068 |
| 138B ->146B | -0.51250 |
| 138B ->147B | -0.14776 |
| 138B ->148B | -0.12954 |

[Au(PyBTM)(PPh<sub>3</sub>)]<sup>+</sup> (UM06/ SDD(Au), 6-31G(d)(H, C, N, Cl, P), SCRF (solvent = CH<sub>2</sub>Cl<sub>2</sub>)), ground state 207A is SOMO.

Excited State 1: 2.187-A 2.4530 eV 505.43 nm f=0.0448 <S\*\*2>=0.946

207A ->210A 0.15708  
201B ->207B -0.19264  
205B ->207B 0.91597  
205B ->208B 0.12992

Excited State 2: 2.231-A 2.6039 eV 476.14 nm f=0.0089 <S\*\*2>=0.995

207A ->208A 0.25911  
194B ->207B 0.13074  
199B ->207B 0.58254  
204B ->207B 0.67964

Excited State 3: 2.106-A 2.7520 eV 450.52 nm f=0.0098 <S\*\*2>=0.858

201B ->207B 0.94897  
205B ->207B 0.23180

Excited State 4: 2.163-A 2.7591 eV 449.37 nm f=0.0023 <S\*\*2>=0.920

207A ->208A -0.25521  
199B ->207B -0.59841  
204B ->207B 0.69659

Excited State 5: 2.180-A 2.9511 eV 420.13 nm f=0.1901 <S\*\*2>=0.939

196A ->208A -0.14875  
207A ->208A 0.80341  
194B ->207B 0.27674  
199B ->207B -0.41347

Excited State 6: 2.129-A 2.9967 eV 413.73 nm f=0.0005 <S\*\*2>=0.883

195B ->207B -0.10945  
196B ->207B 0.12600  
206B ->207B 0.98070

## References

1. S. Akine, *TitrationFit, ver 1.1.0, for analysis of titration data in host-guest chemistry*, **2013**.  
[http://chem.s.kanazawa-u.ac.jp/coord/titrationfit\\_e.html](http://chem.s.kanazawa-u.ac.jp/coord/titrationfit_e.html).
